# Supplementary material for: The Genome of Borrelia recurrentis, the Agent of Deadly Louse-Borne Relapsing Fever, Is a Degraded Subset of Tick-Borne Borrelia duttonii
Source: PubMed Central journal article supplement (PMC2525819; doi:10.1371/journal.pgen.1000185), 2008-09-12

# Whole sequenced borreliae chromosome display including recurrent fever group *B. duttonii* and *B. recurrentis* and Lyme disease group *B. burgdorferi*, *B. garinii* and *B. afzelii*.

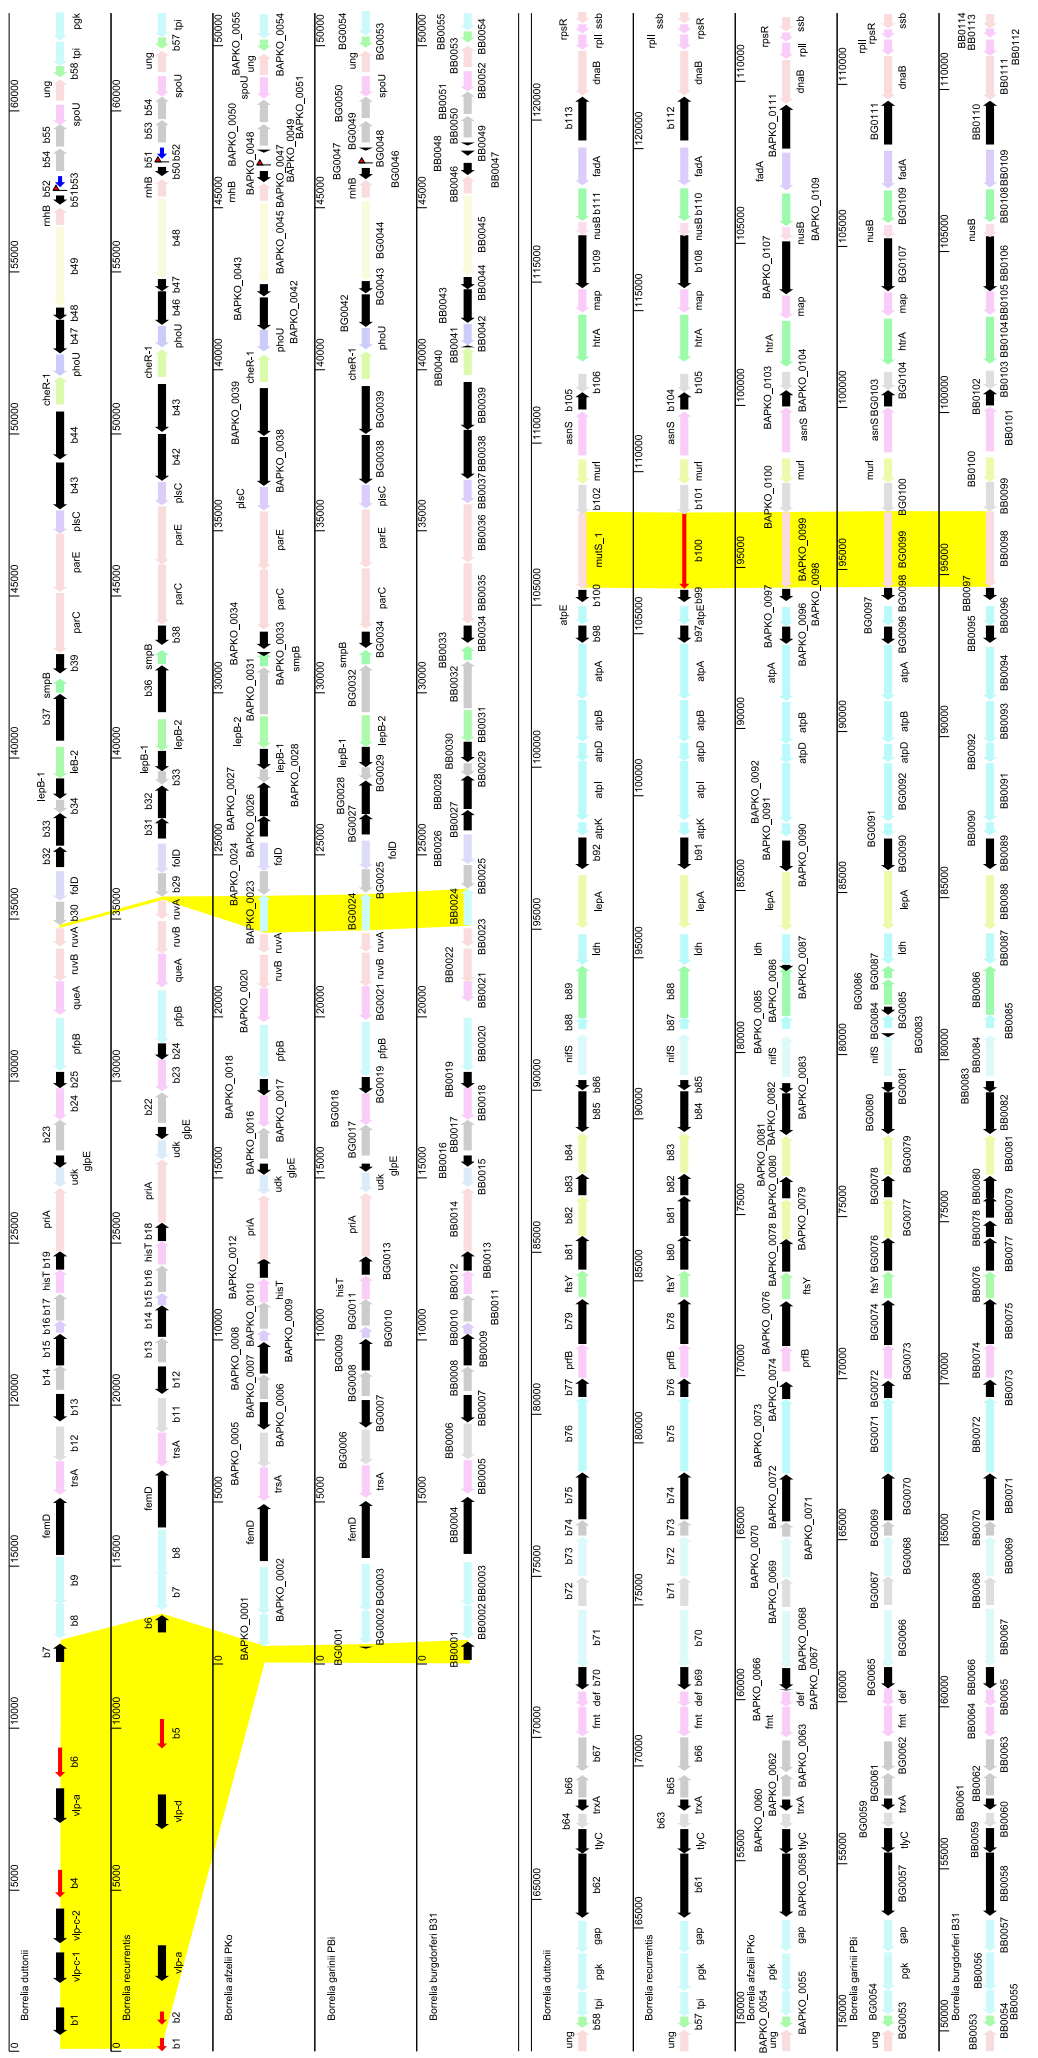



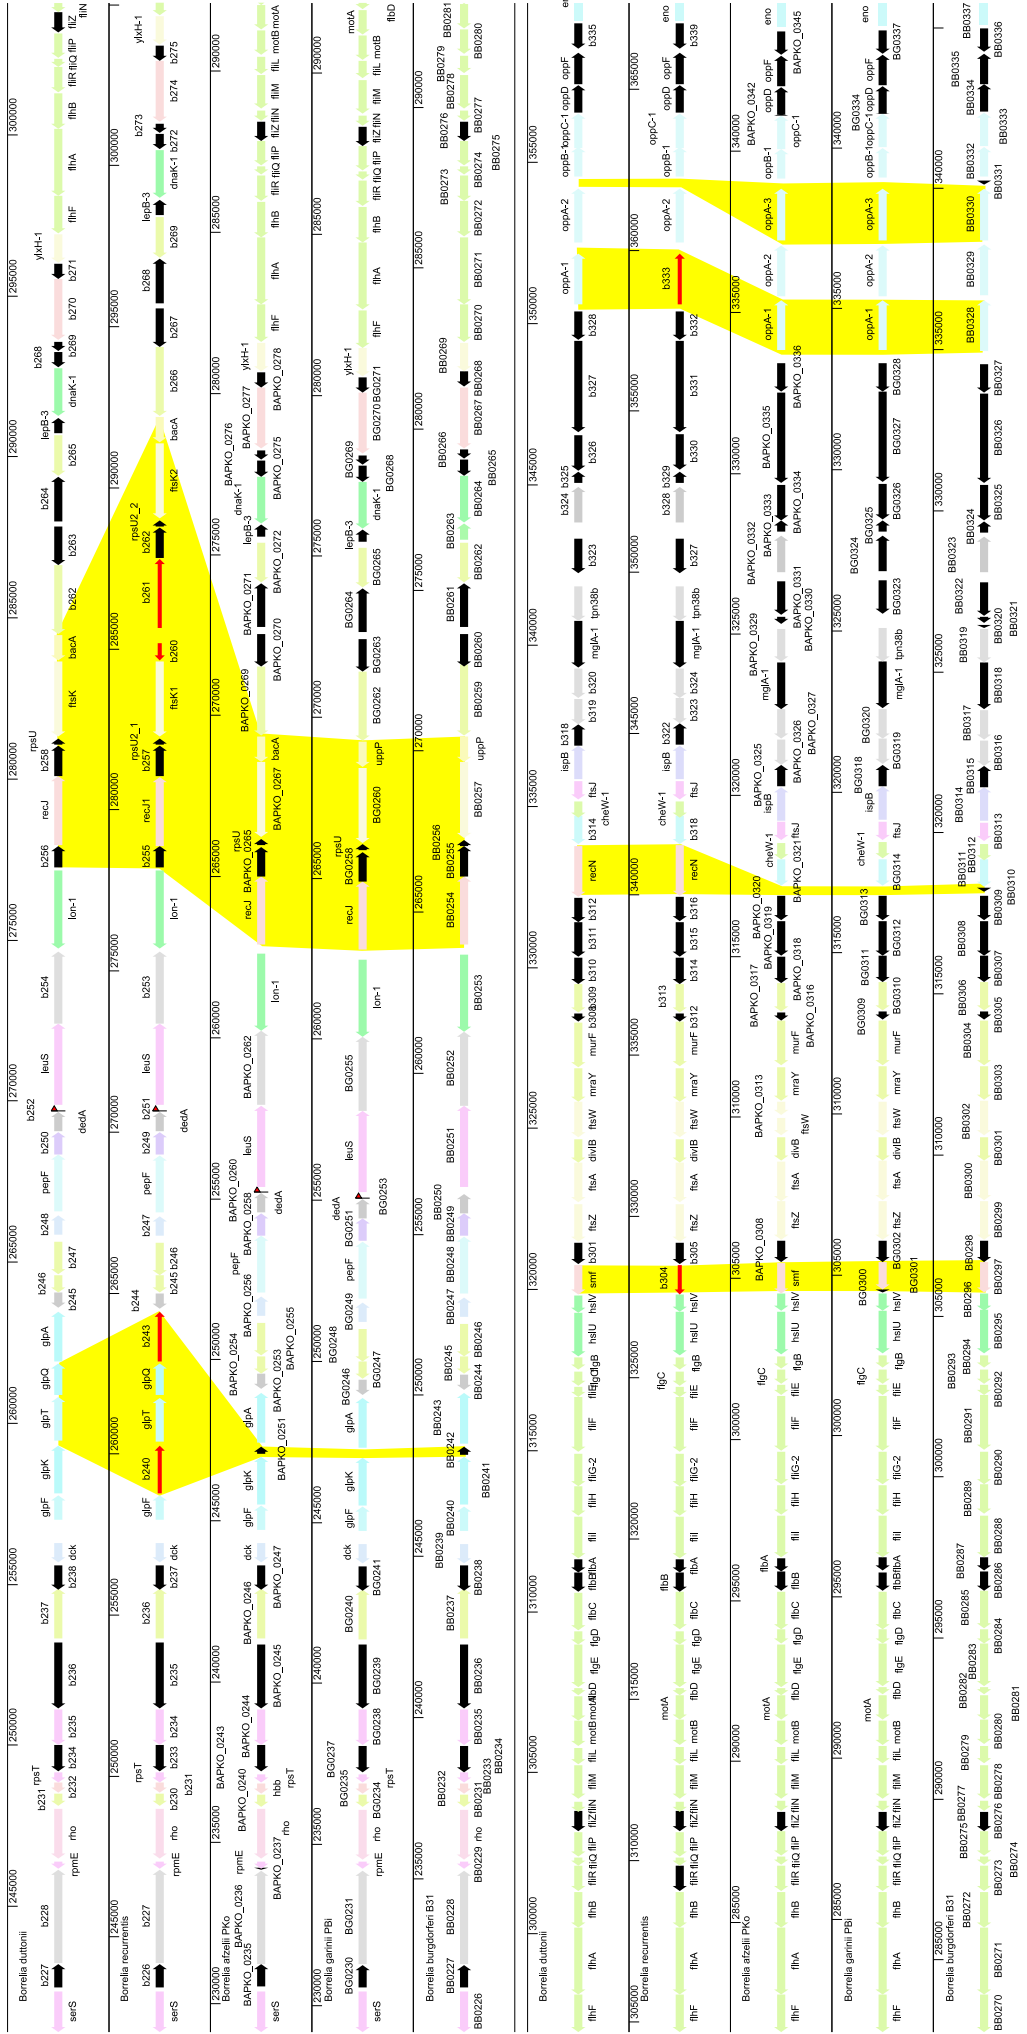









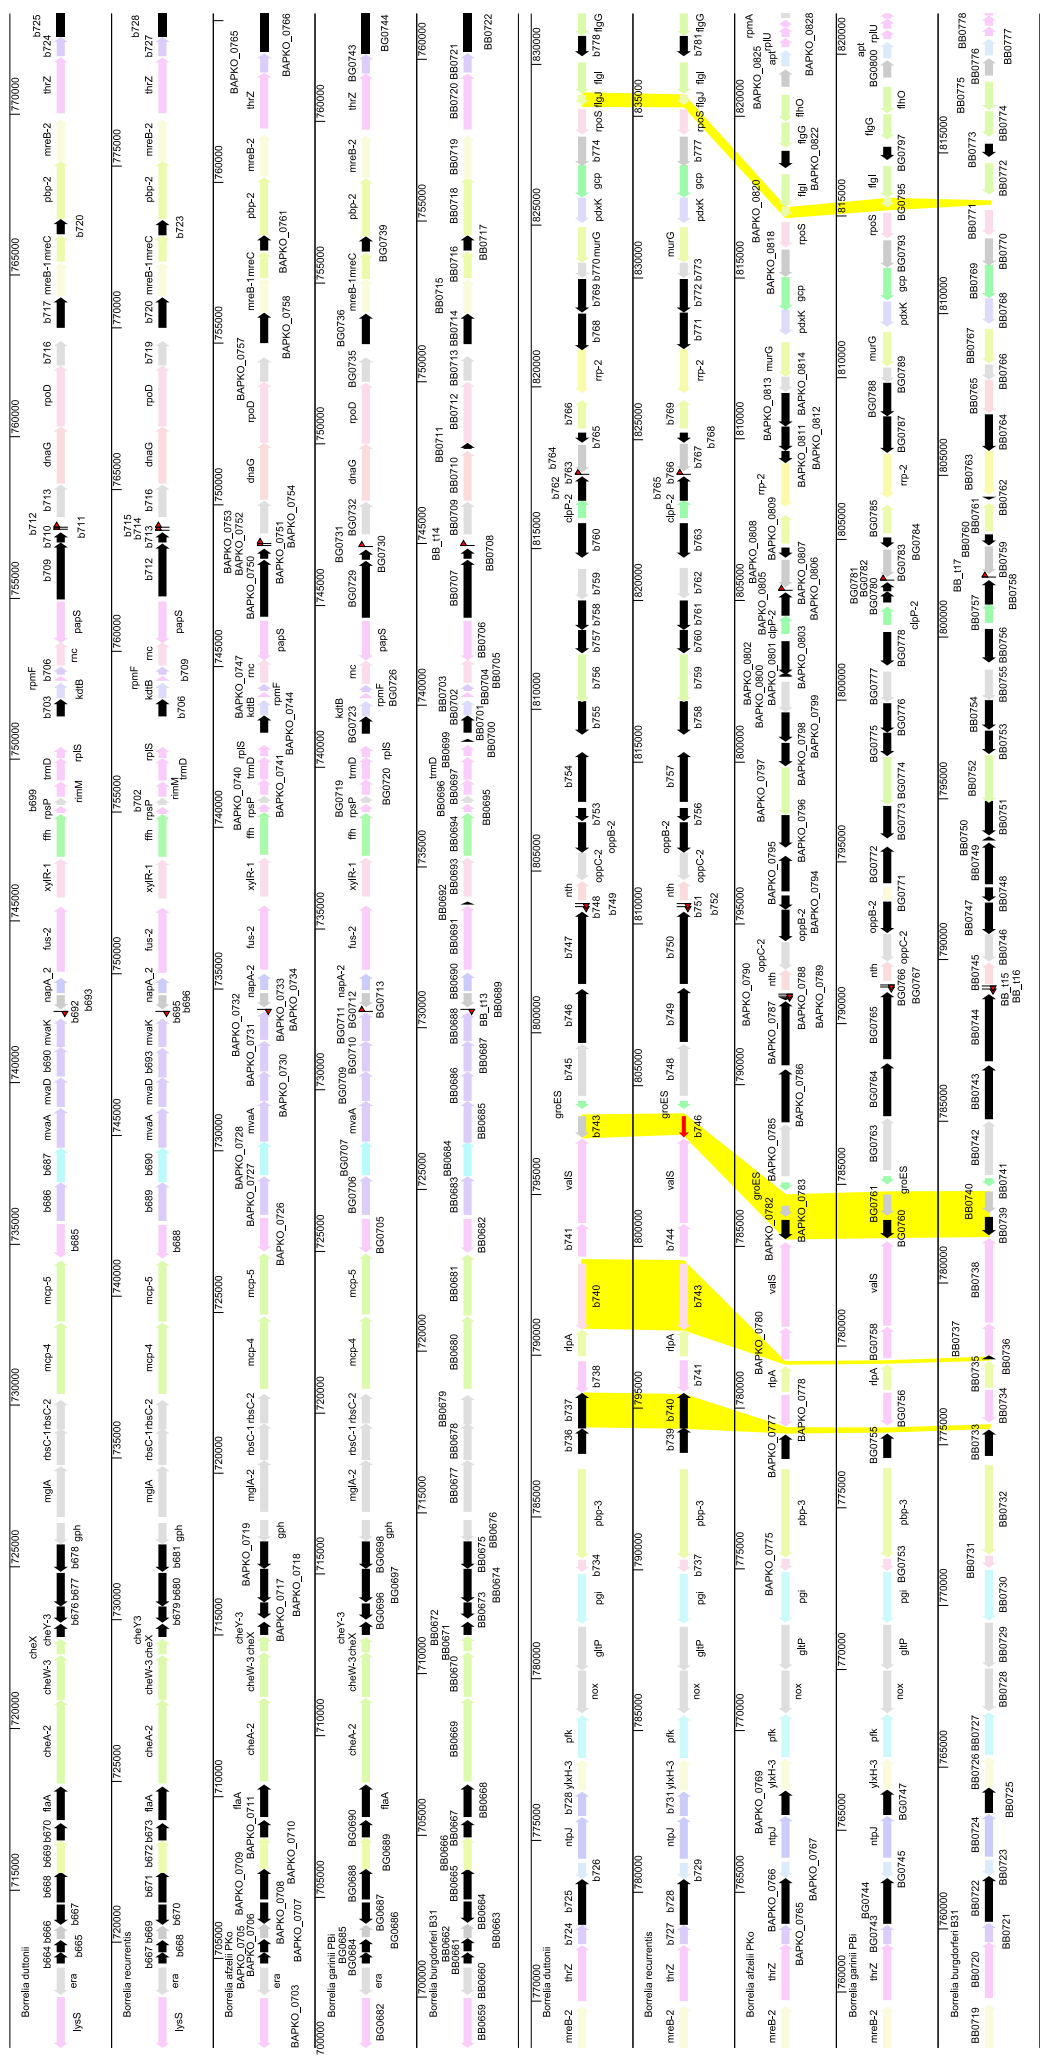

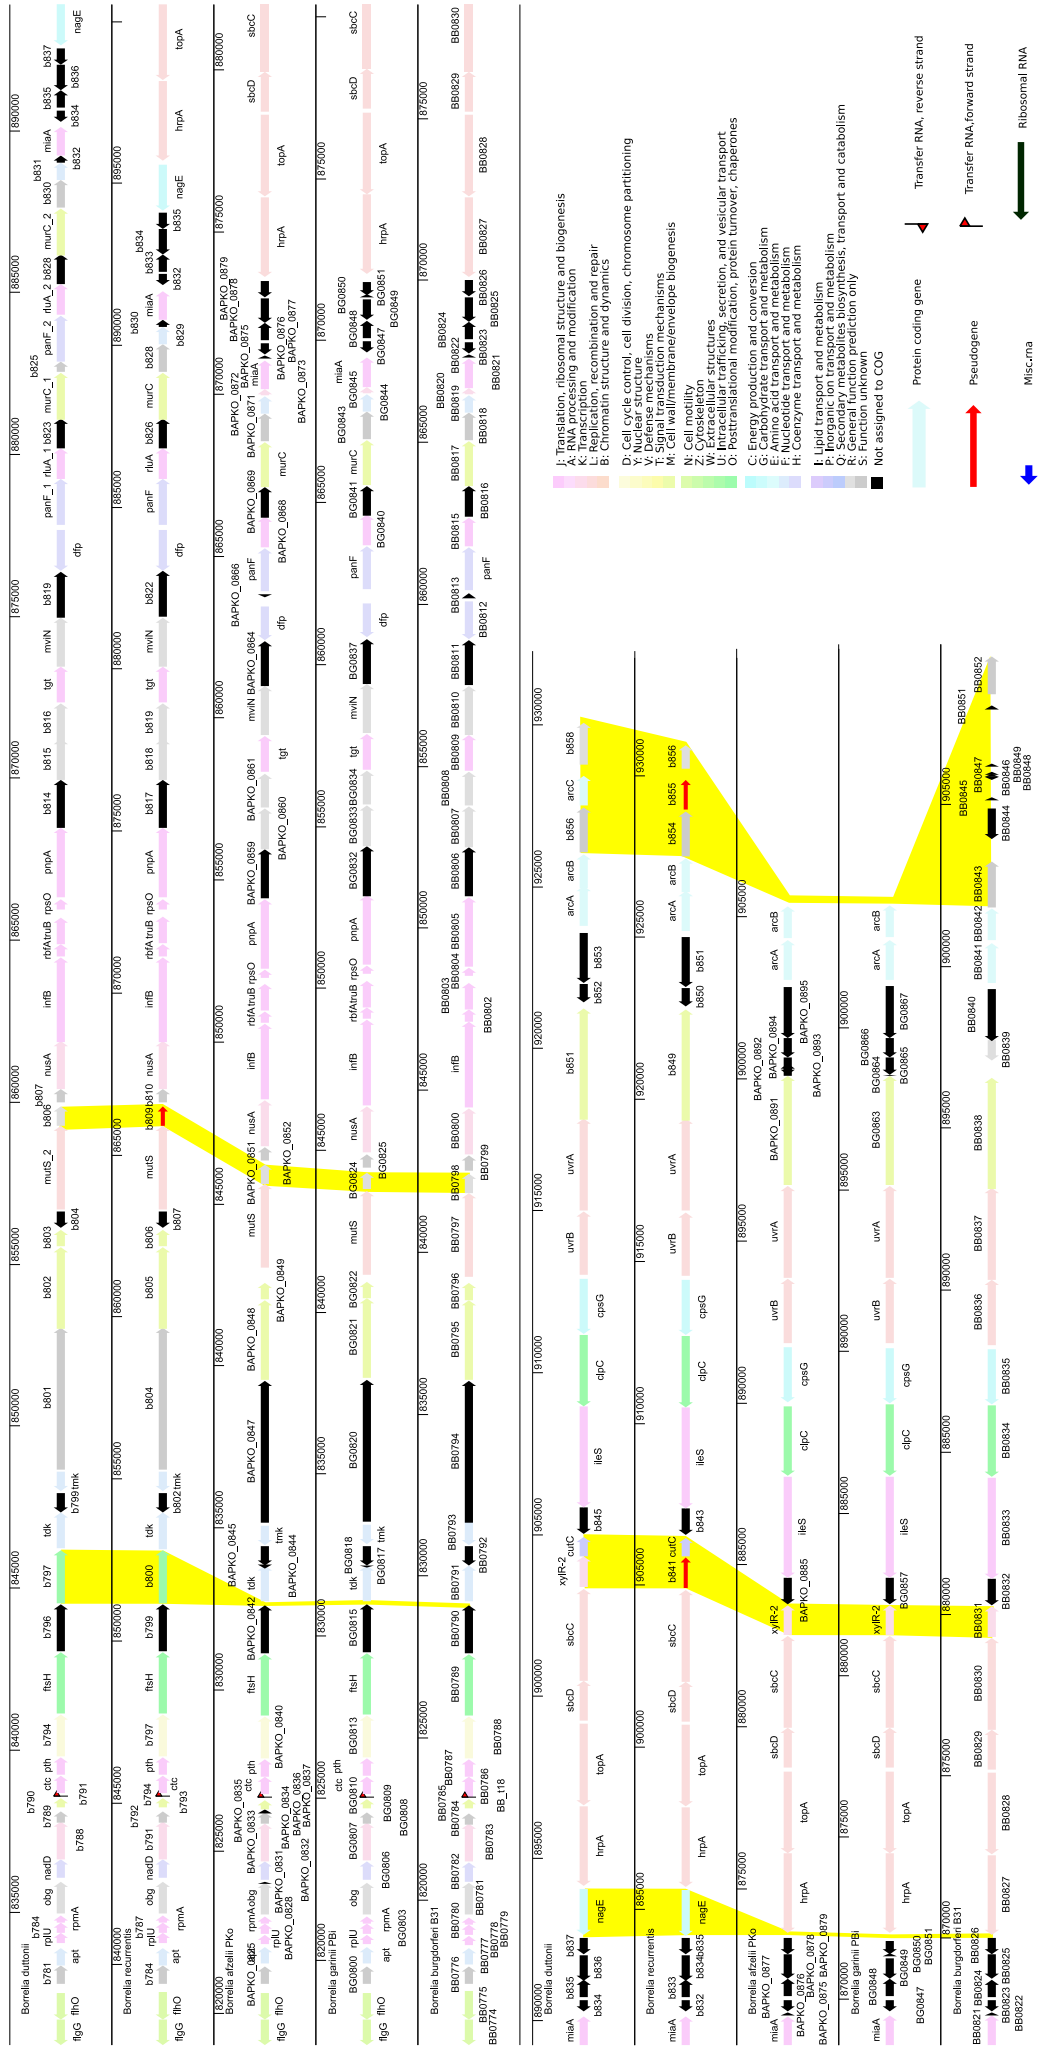

Supplement: pgen.1000185.s001.pdf [file pgen.1000185.s001.pdf]
