# Supplementary material for: The Genome of Borrelia recurrentis, the Agent of Deadly Louse-Borne Relapsing Fever, Is a Degraded Subset of Tick-Borne Borrelia duttonii
Source: PubMed Central journal article supplement (PMC2525819; doi:10.1371/journal.pgen.1000185), 2008-09-12

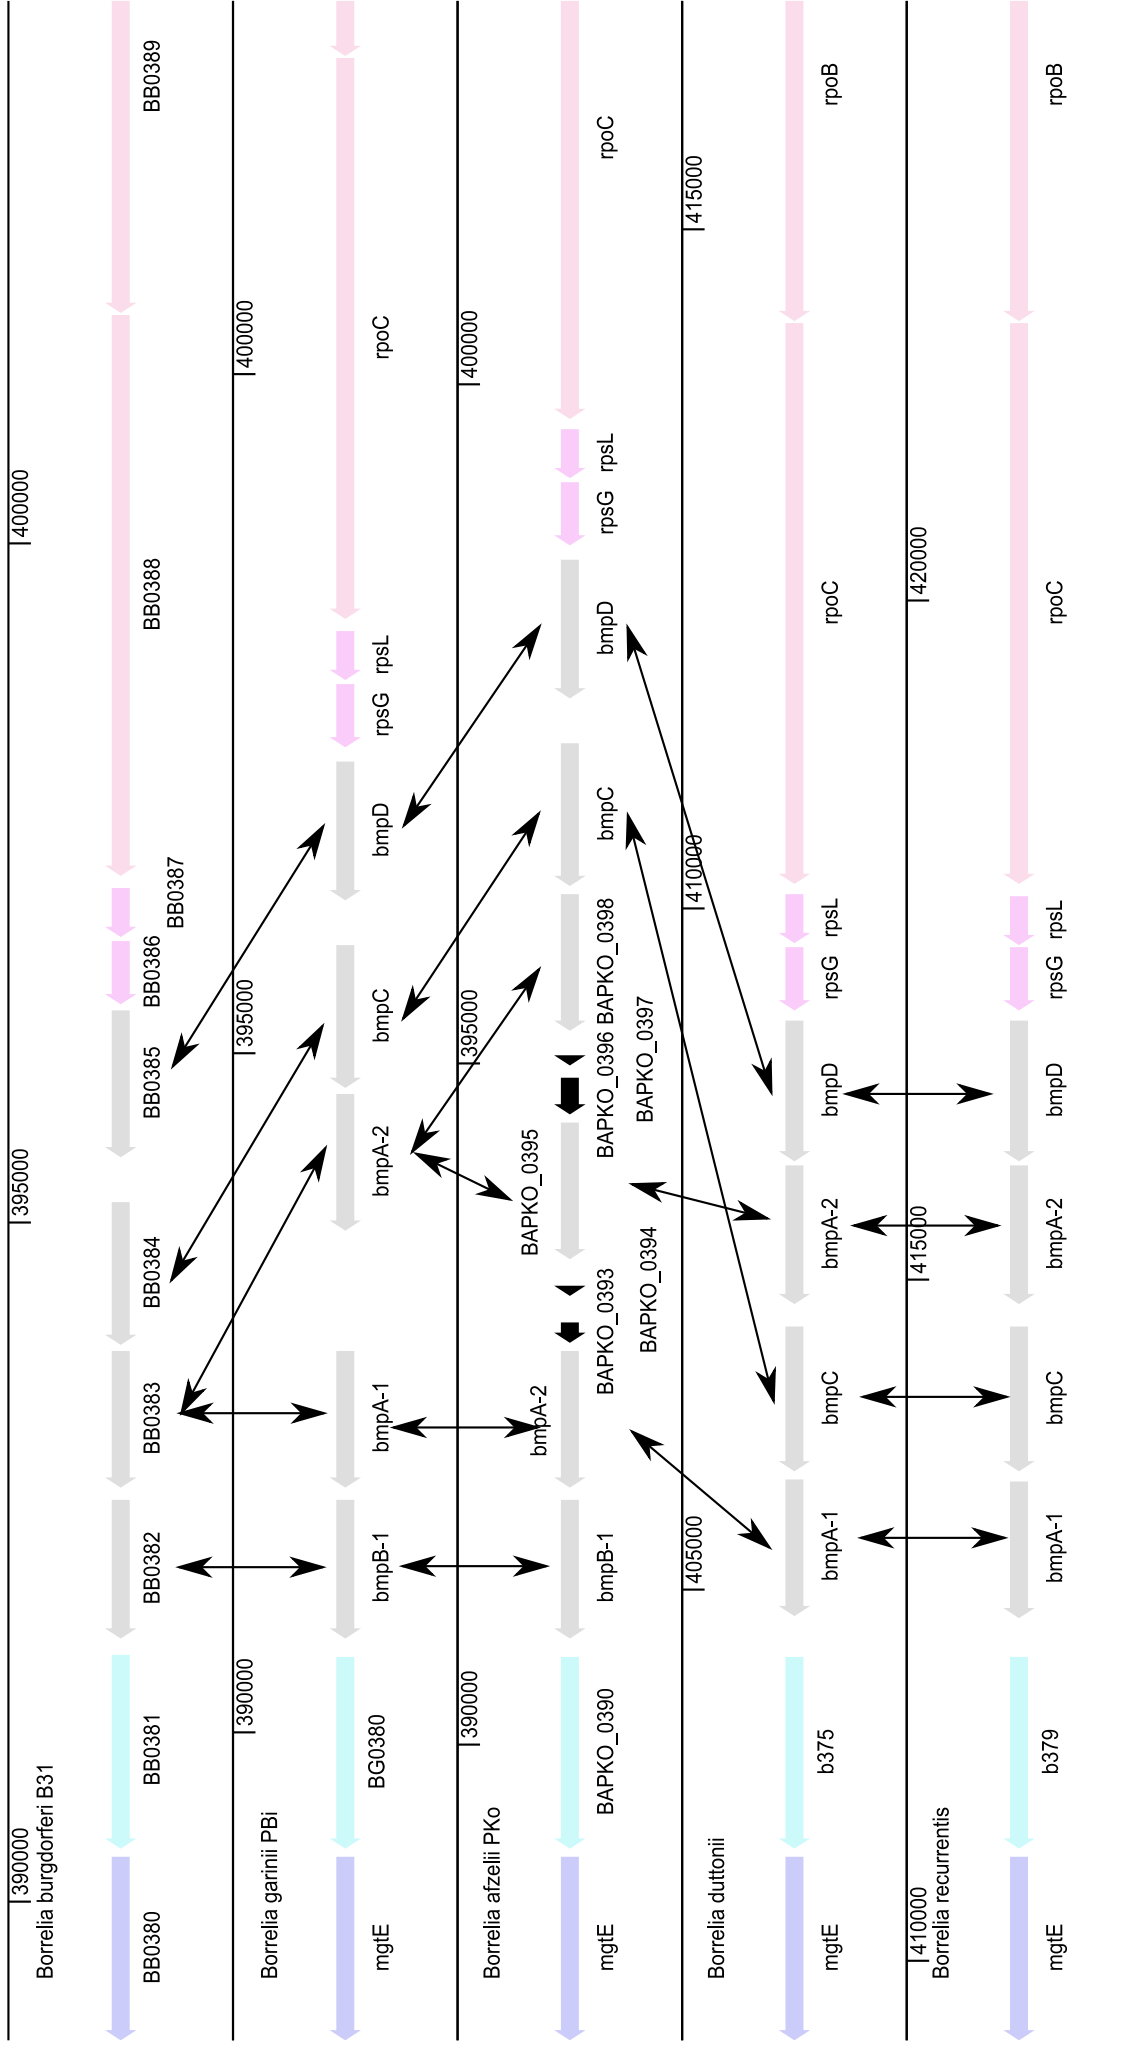

Supplement: pgen.1000185.s005.pdf [file pgen.1000185.s005.pdf]
