# Supplementary material for: The Genome of Borrelia recurrentis, the Agent of Deadly Louse-Borne Relapsing Fever, Is a Degraded Subset of Tick-Borne Borrelia duttonii
Source: PubMed Central journal article supplement (PMC2525819; doi:10.1371/journal.pgen.1000185), 2008-09-12
Supplement: pgen.1000185.s007.pdf [file pgen.1000185.s007.pdf]

## First migration

*B. duttonii*      *B. recurrentis*

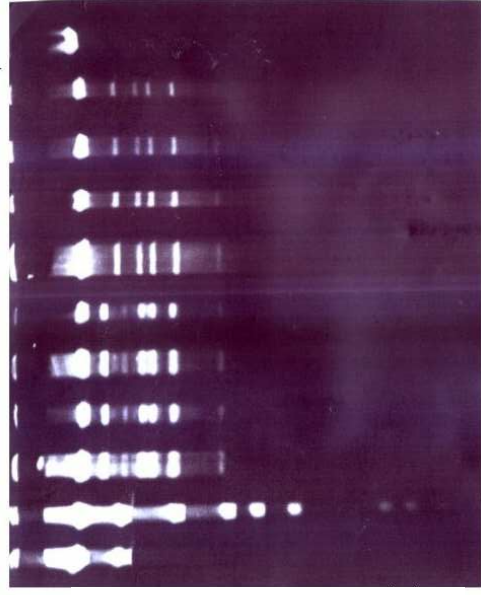

48kb  
24kb  
9kb  
6kb  
4kb  
2.3kb  
2kb

## Second migration

*B. duttonii*      *B. recurrentis*

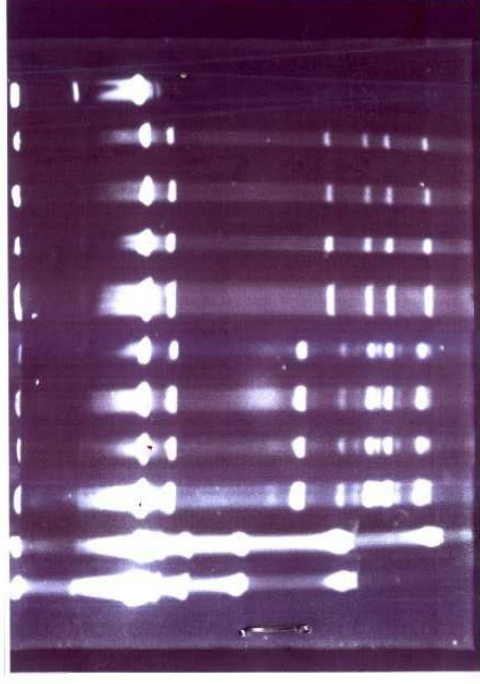

>145kb  
145kb  
95kb  
48kb  
24kb

## Third migration

*B. duttonii*      *B. recurrentis*

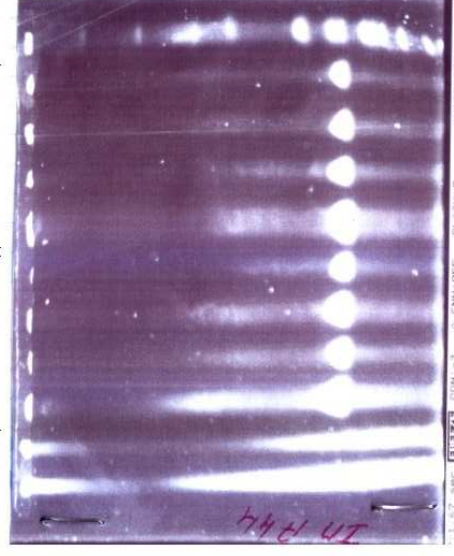

1020kb  
945kb  
825kb  
785kb  
750kb
